# Supplementary material for: Enhancing Preparedness for Arbovirus Infections with a One Health Approach: The Development and Implementation of Multisectoral Risk Assessment Exercises
Source: Biomed Res Int. 2020 Apr 20;2020:4832360. doi: 10.1155/2020/4832360 (PMC7191441; doi:10.1155/2020/4832360)
Supplement: Supplementary Materials — Additional file 1: file format: excel; title of data: data analysis of the evaluation of the exercises and the added value of multisectoral approach. Description of data: replies of the participants to the questions related to the evaluation of the exercises and perceived participants' added value of the multisectoral approach. [file 4832360.f1.xlsx]

## Sheet: replies evaluation
	Exercise objectives well communicated (#)					Overall the exercise was satisfactory (#)
	WNV	CCHF	RVF			WNV	CCHF	RVF
strongly agree	46	20	10		strongly agree	41	1	5
agree	19	13	15		agree	20	13	17
neither agree nor disagree	1	3	5		neither agree nor disagree	4	22	8
disagree	0	1	0		NA	1	1	0
NA	0	0	0			66	37	30
	66	37	30
	Exercise objectives well communicated (%)					Overall the exercise was satisfactory (%)
	WNV	CCHF	RVF			WNV	CCHF	RVF
strongly agree	69.697	54.0541	33.3333		strongly agree	62.1212	59.4595	26.6667
agree	28.7879	35.1351	50		agree	30.303	35.1351	56.6667
neither agree nor disagree	1.51515	8.10811	16.6667		neither agree nor disagree	6.06061	2.7027	16.6667
disagree	0	2.7027	0		NA	1.51515	2.7027	0
NA	0	0	0
	100	100	100			100	100	100
	Discussions useful (#)					Adeguate time allotted (#)
	WNV	CCHF	RVF			WNV	CCHF	RVF
strongly agree	49	26	19		strongly agree	39	22	5
agree	15	10	8		agree	22	12	11
neither agree nor disagree	2	1	3		neither agree nor disagree	5	3	12
NA	0				disagree	0	0	2
	66	37	30		NA	0	0	0
						66	37	30
	Discussions useful (%)					Adeguate time allotted (%)
strongly agree	WNV	CCHF	RVF			WNV	CCHF	RVF
agree	74.2424	70.2703	63.3333		strongly agree	59.0909	59.4595	16.6667
neither agree nor disagree	22.7273	27.027	26.6667		agree	33.3333	32.4324	36.6667
NA	3.0303	2.7027	10		neither agree nor disagree	7.57576	8.10811	40
					disagree			6.66667
	100	100	100		NA
						100	100	100

## Sheet: Analysis
	Exercise objectives well communicated (%)
	WNV	CCHF	RVF
strongly agree/agree	99	89	83
neither agree nor disagree	1	8.10811	16.6667
disagree	0	2.7027	0
NA	0	0	0
	100	99.8108	99.6667
	Overall the exercise was satisfactory (%)
	WNV	CCHF	RVF
strongly agree /agree	92	94	83
neither agree nor disagree	6.06061	3	16.6667
NA	1.51515	2.7027	0
	99.5758	99.7027	99.6667
	Discussions useful (%)
	WNV	CCHF	RVF
strongly agree /agree	97	97	90
neither agree nor disagree	3.0303	2.7027	10
NA	0	0	0
	100	100	100
	Adeguate time allotted (%)
	WNV	CCHF	RVF
strongly agree /agree	92	92	54
neither agree nor disagree	7.57576	8.10811	40
disagree	0	0	6.66667
NA

## Sheet: Added value CCHF
Country	Added value of multi-sector approach for each of the questions of the assessment CCHF
	(Low/medium/high)
	1. Is this threat unusual or unexpected?	2. What is the potential for transmission within your country?	3. Is it likely to cause severe disease in the population?	4. Are effective treatments and control measures available?	5. Are there contextual factors that may affect the risk assessment?					Q.	H	M	L
	high	high	high	medium	medium					1	10	1	0
	high	high	medium	low	high					2	9	2	0
	high	high	high	high	high					3	6	5	0
	high	high	medium	medium	high					4	5	3	3
	high	high	high	low	high					5	10	1	0
	high	high	High	medium	high
	high	high	medium	low	high								%
	medium	medium	medium	high	high					Q.	H	M	L
	high	high	medium	high	high					1	90.9091	9.09091	0
	high	medium	high	high	high					2	81.8182	18.1818	0
	high	high	high	high	high					3	54.5455	45.4545	0
											4	46	27.2727	27.2727
											5	90.9091	9.09091	0
CCHF RA exercise	Multisector Added Value
Risk Questions	High	Medium	Low
1. Is this threat unusual or unexpected?	10(91%)	1 (9%)	0
2. What is the potential for transmission within your country?	9(82%)	2(18%)	0
3. Is it likely to cause severe disease in the population?	6(55%)	5 (45%)	0
4. Are effective treatments and control measures available?	5(46%)	3 (27%)	3(27%)
5. Are there contextual factors that may affect the risk assessment?	10(91%)	1 (9%)	0

## Sheet: Added value RVF & CCHF
Country	Added value of multi-sectorial assessment				RVF
	(Low/medium/high)
	1.a Risk factors in Africa and other areas with a history of RVF infection or outbreak	1.b Risk factors for new areas	2. Preparedness measures	3. Prevention and control options	4.a Risk of introduction in your country	4.b Risk of persistence in your country					H	M	L
	High	High	Medium	High	High	medium				1.a	6	2	0
	Medium	Medium	High	Medium	Medium	medium				1.b	5	3	0
	High	Medium	Medium	High	Medium	High				2	6	2	0
	Medium	High	High	Medium	Medium	Low				3	6	2	0
	High	High	High	High	High	Medium				4.a	4	4	0
	High	Medium	High	High	Medium	Medium				4.b	3	4	1
	High	High	High	High	High	High
	High	High	High	High	High	High							%
											H	M	L
										1.a	75	25	0
										1.b	62.5	37	0
										2	75	25	0
										3	75	25	0
										4.a	50	50	0
RVF RA exercise	Multisector Added Value									4.b	37	50	12.5
Risk Questions	High	Medium	Low				RVF Risk Questions	High	Medium	Low
1.a Risk factors in Africa and other areas with a history of RVF infection or outbreak	6(75%)	2(25%)	0				6.Risk factors in Africa and other areas with a history of RVF infection or outbreak	6	2	0
1.b Risk factors for new areas	5(63%)	3(37%)	0				5.Risk factors for new areas	5	3	0
2. Preparedness measures	6(75%)	2(25%)	0				4.Preparedness measures	6	2	0
3. Prevention and control options	6(75%)	2(25%)	0				3.Prevention and control options	6	2	0
4.a Risk of introduction in your country	4(50%)	4(50%)	0				2.Risk of introduction in your country	4	4	0
4.b Risk of persistence in your country	3(37%)	4(50%)	1(13%)				1.Risk of persistence in your country	3	4	1
CCHF RA exercise	Multisector Added Value
Risk Questions	High	Medium	Low				CCHF Risk Questions	High	Medium	Low
1. Is this threat unusual or unexpected?	10(91%)	1 (9%)	0				5. Is this threat unusual or unexpected?	10	1	0
2. What is the potential for transmission within your country?	9(82%)	2(18%)	0				4. What is the potential for transmission within your country?	9	2	0
3. Is it likely to cause severe disease in the population?	6(55%)	5 (45%)	0				3. Is it likely to cause severe disease in the population?	6	5	0
4. Are effective treatments and control measures available?	5(46%)	3 (27%)	3(27%)				2. Are effective treatments and control measures available?	5	3	3
5. Are there contextual factors that may affect the risk assessment?	10(91%)	1 (9%)	0				1. Are there contextual factors that may affect the risk assessment?	10	1	0
